# Supplementary material for: Nature Photographs as Complementary Care in Chemotherapy: A Randomized Clinical Trial
Source: MDPI journal article supplement (doi:10.3390/ijerph20166555), 2023-08-10
Supplement: s1 [file s1]

## e-NATURE VIDEO: MISC

CATEGORIES: WATER, TREES, PALE BIRDS, COLORFUL BIRDS, SKY, FLOWERS, INSECTS AND LANDSCAPES

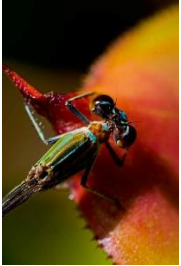

Valence (pleasure)  
rating: 5.3  
Arousal/relaxation rating:  
6.1

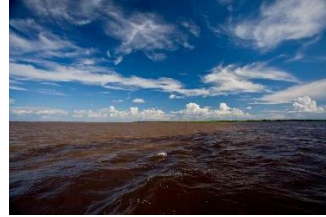

Valence (pleasure)  
rating: 5.5  
Arousal/relaxation rating:  
6.1

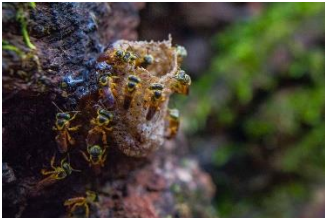

Valence (pleasure)  
rating: 6.1  
Arousal/relaxation rating:  
5.7

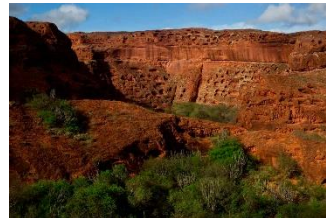

Valence (pleasure)  
rating: 5.8  
Arousal/relaxation rating:  
5.3

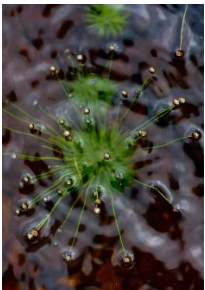

Valence (pleasure)  
rating: 5.9  
Arousal/relaxation rating:  
5.2

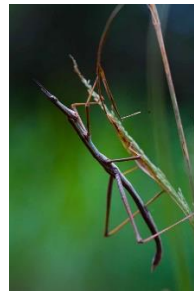

Valence (pleasure)  
rating: 6.2  
Arousal/relaxation rating:  
5.3

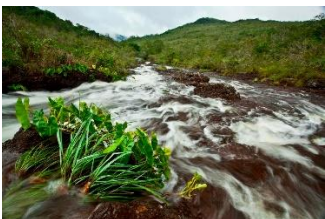

Valence (pleasure)  
rating: 6.5  
Arousal/relaxation rating:  
5.4

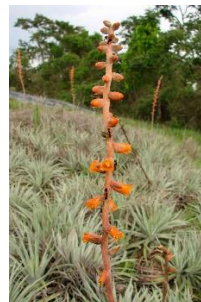

Valence (pleasure)  
rating: 6.1  
Arousal/relaxation rating:  
5.0

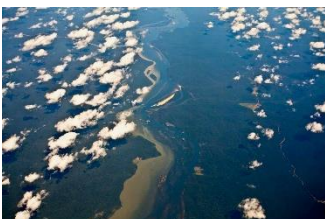

Valence (pleasure)  
rating: 6.3  
Arousal/relaxation rating:  
5.1

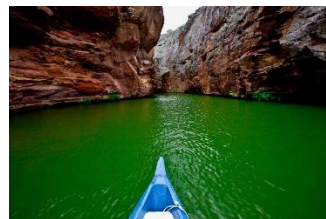

Valence (pleasure)  
rating: 6.9  
Arousal/relaxation rating:  
5.1

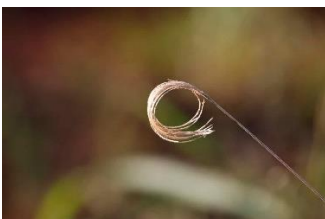

Valence (pleasure)  
rating: 5.7  
Arousal/relaxation rating:  
4.7

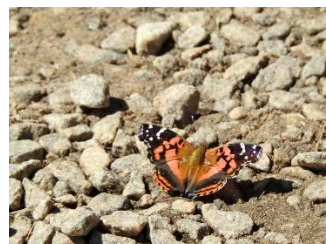

Valence (pleasure)  
rating: 5.6  
Arousal/relaxation rating:  
4.6

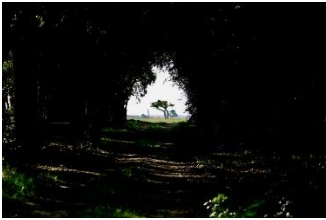

Valence (pleasure)  
rating: 6.3  
Arousal/relaxation rating:  
4.7

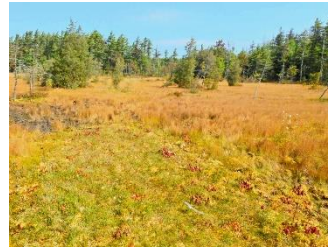

Valence (pleasure)  
rating: 6.2  
Arousal/relaxation rating:  
4.6

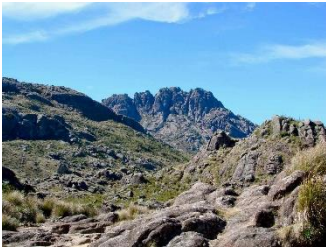

Valence (pleasure)  
rating: 6.6  
Arousal/relaxation rating:  
4.7

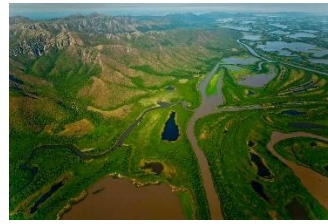

Valence (pleasure)  
rating: 6.5  
Arousal/relaxation rating:  
4.8

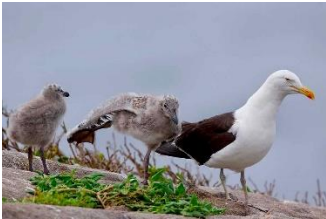

Valence (pleasure)  
rating: 6.4  
Arousal/relaxation rating:  
4.5

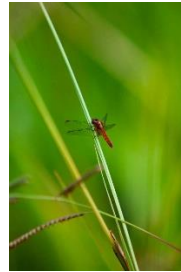

Valence (pleasure)  
rating: 6.5  
Arousal/relaxation rating:  
4.6

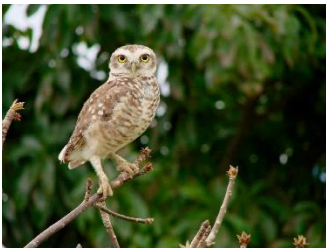

Valence (pleasure)  
rating: 7.1  
Arousal/relaxation rating:  
4.9

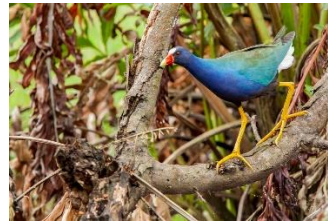

Valence (pleasure)  
rating: 6.8  
Arousal/relaxation rating:  
4.6

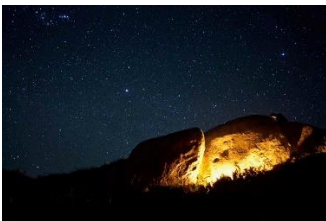

Valence (pleasure)  
rating: 6.6  
Arousal/relaxation rating:  
4.3

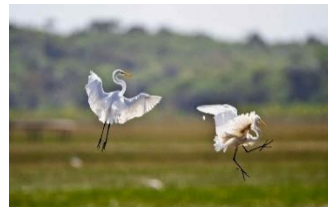

Valence (pleasure)  
rating: 7.0  
Arousal/relaxation rating:  
4.5

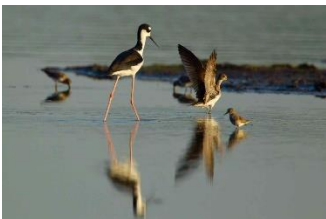

Valence (pleasure)  
rating: 6.6  
Arousal/relaxation rating:  
4.3

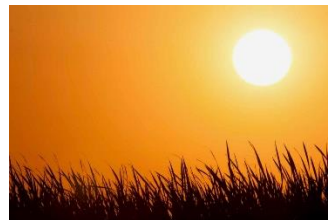

Valence (pleasure)  
rating: 6.9  
Arousal/relaxation rating:  
4.3

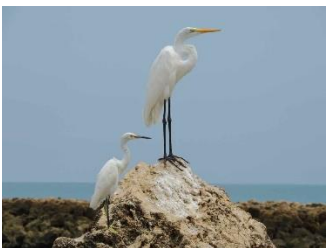

Valence (pleasure)  
rating: 6.7  
Arousal/relaxation rating:  
4.0

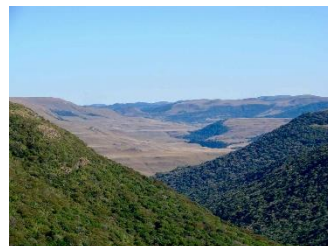

Valence (pleasure)  
rating: 6.7  
Arousal/relaxation rating:  
4.0

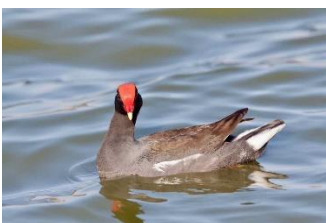

Valence (pleasure)  
rating: 6.8  
Arousal/relaxation rating:  
3.9

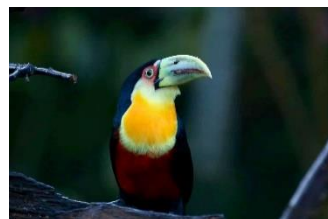

Valence (pleasure)  
rating: 7.1  
Arousal/relaxation rating:  
4.3



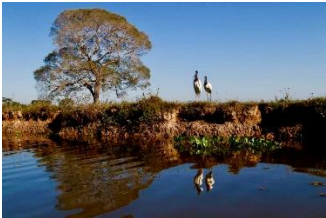

Valence (pleasure)  
rating: 6.8  
Arousal/relaxation rating:  
3.9

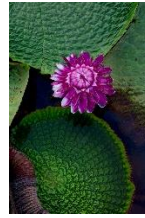

Valence (pleasure)  
rating: 7.1  
Arousal/relaxation rating:  
4.2

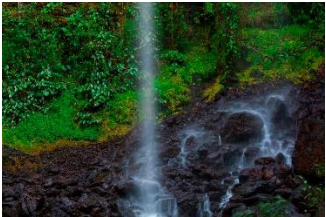

Valence (pleasure)  
rating: 7.1  
Arousal/relaxation rating:  
4.2

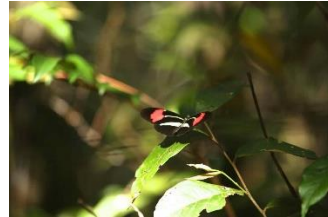

Valence (pleasure)  
rating: 6.8  
Arousal/relaxation rating:  
3.9

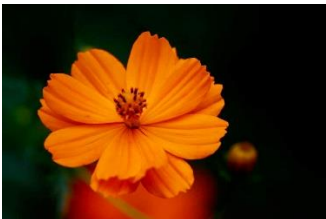

Valence (pleasure)  
rating: 7.1  
Arousal/relaxation rating:  
4.2

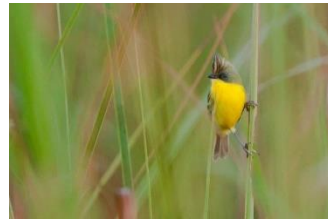

Valence (pleasure)  
rating: 7.0  
Arousal/relaxation rating:  
4.1

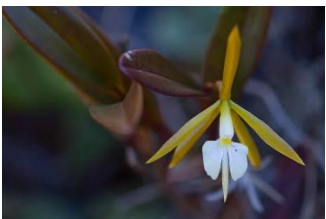

Valence (pleasure)  
rating: 6.7  
Arousal/relaxation rating:  
3.8

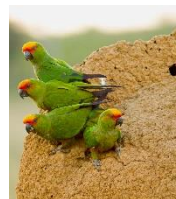

Valence (pleasure)  
rating: 7.5  
Arousal/relaxation rating:  
4.5

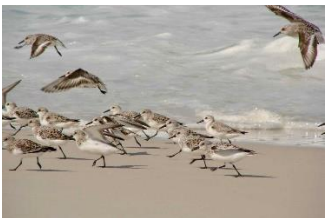

Valence (pleasure)  
rating: 7.4  
Arousal/relaxation rating:  
4.4

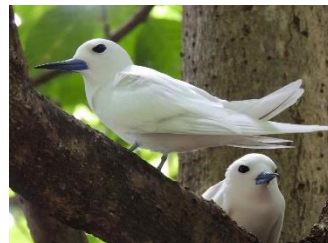

Valence (pleasure)  
rating: 7.2  
Arousal/relaxation rating:  
4.2

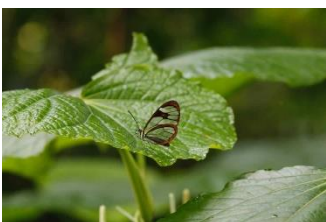

Valence (pleasure)  
rating: 6.8  
Arousal/relaxation rating:  
3.7

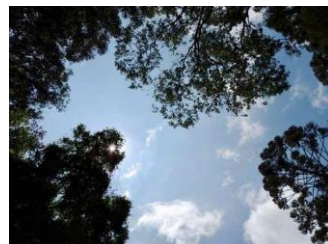

Valence (pleasure)  
rating: 7.0  
Arousal/relaxation rating:  
3.9

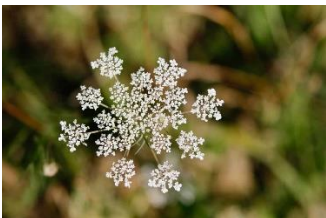

Valence (pleasure)  
rating: 7.0  
Arousal/relaxation rating:  
3.8

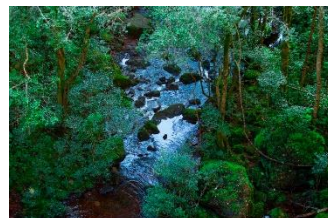

Valence (pleasure)  
rating: 7.1  
Arousal/relaxation rating:  
3.9

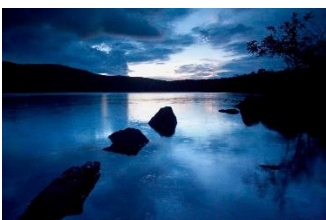

Valence (pleasure)  
rating: 6.5  
Arousal/relaxation rating:  
3.3

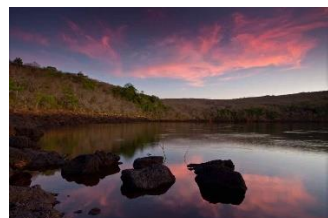

Valence (pleasure)  
rating: 6.7  
Arousal/relaxation rating:  
3.5

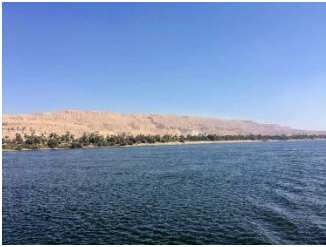

Valence (pleasure)  
rating: 6.7  
Arousal/relaxation rating:  
3.4

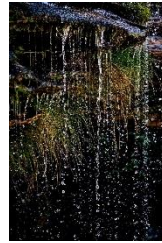

Valence (pleasure)  
rating: 7.0  
Arousal/relaxation rating:  
3.7

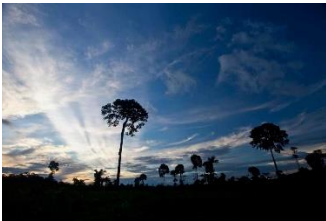

Valence (pleasure)  
rating: 7.3  
Arousal/relaxation rating:  
3.6

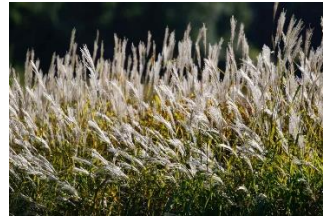

Valence (pleasure)  
rating: 6.8  
Arousal/relaxation rating:  
3.5

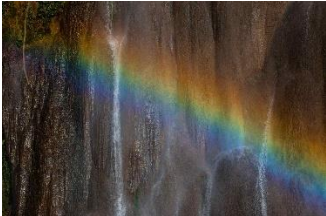

Valence (pleasure)  
rating: 7.1  
Arousal/relaxation rating:  
3.7

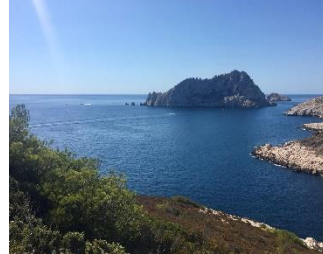

Valence (pleasure)  
rating: 7.3  
Arousal/relaxation rating:  
3.8

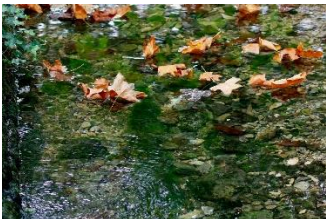

Valence (pleasure)  
rating: 6.9  
Arousal/relaxation rating:  
3.4

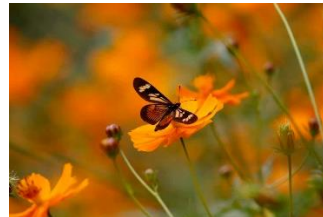

Valence (pleasure)  
rating: 7.3  
Arousal/relaxation rating:  
3.7

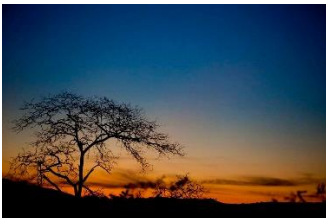

Valence (pleasure)  
rating: 6.7  
Arousal/relaxation rating:  
3.0

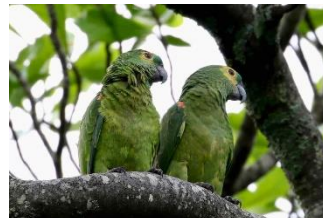

Valence (pleasure)  
rating: 7.3  
Arousal/relaxation rating:  
3.4

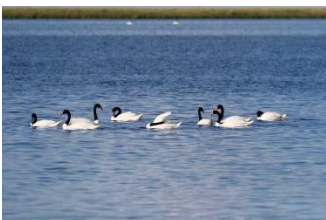

Valence (pleasure)  
rating: 7.2  
Arousal/relaxation rating:  
3.4

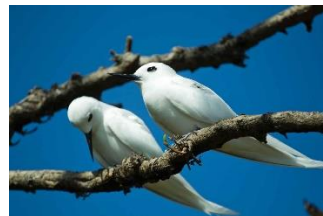

Valence (pleasure)  
rating: 7.1  
Arousal/relaxation rating:  
3.2

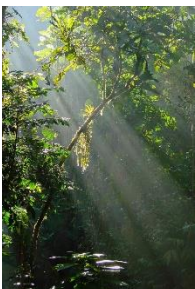

Valence (pleasure)  
rating: 7.2  
Arousal/relaxation rating:  
3.3

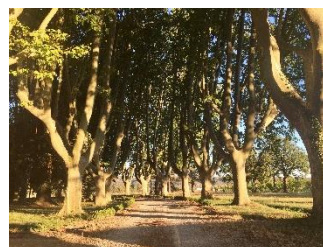

Valence (pleasure)  
rating: 7.5  
Arousal/relaxation rating:  
3.1
