# Supplementary material for: Nature Photographs as Complementary Care in Chemotherapy: A Randomized Clinical Trial
Source: Int J Environ Res Public Health. 2023 Aug 10;20(16):6555. doi: 10.3390/ijerph20166555 (PMC10454289; doi:10.3390/ijerph20166555)
Supplement: Supplementary file 1 [file ijerph-20-06555-s001.zip]

Archive with 4 entries (4 files):
- S2_Booklet_Emotionsup_Images.pdf
- S4_Booklet_Miscellany_Images.pdf
- S1_Booklet_Beauty_Images.pdf
- S3_Booklet_Tranquility_Peace_Images.pdf
